# Supplementary material
Source: publisher figshare collection journal article supplement (https://frontiersin.figshare.com/ndownloader/files/26686529)
Supplement: Supplementary file 2 [file 26686529]

Archive with 3 entries (3 files):
- GLOSSARY.docx
- SERVEY_QUESTIONS.pdf
- THEMATIC_ANALYSIS_FINAL.docx
