# Supplementary material
Source: publisher figshare collection journal article supplement (https://frontiersin.figshare.com/ndownloader/files/26686529)
Supplement: Supplementary file 2 [file 26686529 › GLOSSARY.docx]

**Exploring Value Propositions to Drive SSI Adoption**

# **FRONTIERS Establishing Self Sovereign Identity with Blockchain**

## Glossary

An understanding of the following key terms is important to the reader:

**Centralised Internet**

The centralised Internet refers to an architecture in which the user connects to a centralised server which acts as an agent for all communications. The server records and stores both communications and account information. This type of architecture is argued to be problematic as it empowers centralised entities to control loaned or federated identity, bind participants into contracts of adhesion, surveil Internet activity, and gather and repurpose personal data and information.

**Decentralised Internet**

A Decentralised Internet in the context of this research is an architecture that rejects the current model of centralised control and asymmetric relationships, and instead rebalances the landscape through peer to peer relationship and participant control. Individuals are afforded agency over their identity and personal data through tools that allow private, secure, censorship-resistant access to information and web services. It can also be interpreted to mean any technology that allows degrees of transparency, partial agency or disruptive capability over the centralised model.

**Human-Centred Data Ecosystem (HCDE)**

This term describes the full ecosystem required to place the human at the centre of personal data streams, affording agency, transparency, and control. The term represents the required concepts, technology, and digital tools. It may also refer to external physical hardware, independent systems, organisational bodies and legislative mechanisms. The term represents all the component parts of the greater ecosystem.

**Human Data Interaction (HDI)**

This term describes an academic field that investigates theory relating to the way humans interact with personal data across the network. The field recognises the imbalances in the current centralised model and states the aim of *‘placing the human at the Centre of the flows of data, providing mechanisms for citizens to interact with these systems and data explicitly*’ (Mortier, 2015, p. 1). Human Data Interaction is the academic field through which this research will be labelled and disseminated.

**Self-Sovereign Identity (SSI)**

The term describes a concept that endeavours to afford participants the same agency in the digital realm as individuals enjoy in the real world. SSI does this by enabling the individual considerable control over both their digital identity and personal data. SSI is not a single technology, rather a wider ecosystem comprising of a number of related components that collectively operate free from any centralised control, ultimately sovereign to the participant. At its core is an identity layer, a means by which an individual can control and manage an online presence, through which relationship, transaction, and personal data can be managed and controlled.

**Sovereign Boundary Mechanism (SBM)**

This term represents a set of methods, tools and user representations that allow for an interaction with a Decentralised Internet, through a Human-Centred Data Ecosystem that enables the principles of Self-Sovereign Identity.The concept represents a standardised interaction, which is best described as a metaphorical ring of steel between the participant and the network, were the participant controls identity, relationships, data streams, and access control.

**Participant**

In the context of this research and indeed the domain, the word *participant* is used to substitute the word *user*. The rational for this is that the individual engaging with the network is sovereign and is not *using* any owned or controlled system, instead they are acting with agency and participating on their own terms.

**GAFA’s**

Acronym to describe the four Internet dominate players, Google, Apple, Facebook and Amazon.
