# Supplementary material
Source: publisher figshare collection journal article supplement (https://frontiersin.figshare.com/ndownloader/files/26686529)
Supplement: Supplementary file 2 [file 26686529 › THEMATIC_ANALYSIS_FINAL.docx]

**Exploring Value Propositions to Drive SSI Adoption**

# **FRONTIERS Establishing Self Sovereign Identity with Blockchain**

Thematic Content Analysis

Resulting Themes from semi Structured Interviews

Table of Contents

1.0 Thematic Content Analysis 4

2.0 Preliminary Thematic Mapping 5

3.0 Resulting Themes 6

4.0 Adoption 6

4.1 The Decentralised Internet Cannot be Marketed. 6

4.1.1 Nobody Really Understands Data 6

4.1.2 People Aren’t Statistically Literate. 6

4.1.3 Individuals Value Information Not Data. 6

4.1.4 Individuals Don’t Really Understand the Concept of Privacy. 6

4.1.5 Privacy as a By Product. 7

4.1.6 Unless They’re A Die-Hard Activist 7

4.1.7 Individuals Don’t Want to Hide. 7

4.1.8 People Simply Don’t Care. 7

4.1.9 People Are Not Rational, They Are Impulsive and Emotional Creatures 7

4.2 The Decentralised Internet Must do Something More 8

4.3 The Individual 8

4.3.1 Streamlining Your Life, Less Friction, Gratification, Transparency. 8

4.3.2 Decentralised Federated Identity. 8

4.3.3 A Sense of Empowerment, Transparency and Agency. 8

4.3.4 Avoiding the Cost of Surveillance Capitalism. 8

4.3.5 Security in The Ephemeral. 8

4.4 For Business 9

4.4.1 Removal of the GAFA Stranglehold. 9

4.4.2 Removing the Friction to Get Things Done. 9

4.4.3 Off Loading the Responsibility, and Cost of Holding Data. 9

4.4.4 In a World of Leaks You Have a Competitive Advantage. 9

4.4.5 Reducing Back Office Costs. 9

4.4.6 High Quality Streamed, Realtime, Non-Statistical Data. 9

4.4.7 New Forms of Business Based on Vendor Relationship Management. 9

4.4.8 Customer Relationships, Trust, KYC. 10

4.5 For Society 10

4.5.1 The Ephemeral for a Healthier Society and Adolescent Development. 10

4.5.2 A Stronger More Cohesive Society. 10

4.5.3 Maintaining Our Democracy. 10

4.5.4 Efficiency in Our Public Services. 10

4.6 The Cultural Context 11

4.6.1 The West Has Just Enough Trust. 11

4.6.2 Parts of the World and Cultures that Value Privacy. 11

4.6.3 One Size Does Not Fit All. 11

4.7 Routes to Adoption 11

4.7.1 High Value High Friction. 11

4.7.2 Targeting Cultural Context as a Brake Through Mechanism. 11

4.7.3 On-boarding Existing Customers 12

4.8 Barriers and Issues 12

4.8.1 Getting to The Interface Layer. 12

4.8.2 Decentralisation Works Both Ways. 12

4.8.3 Complex Technology Can Exclude Certain Social Groups. 12

4.8.4 Decentralised Technology Means Responsibility. 13

4.8.5 Individuals Don’t Trust Themselves. 13

4.8.6 Dealing with A Spectrum of Interactions Through the Same Technology. 13

4.8.7 Non-Profit Does Not Make A Good Business Model. 13

5.0 Interface ‘Cognitive Load’ 13

5.1 Sovereign Boundary Mechanism. 14

5.1.1 By Its Very Nature Sovereign and User Centric Suggests the Individual. 14

5.1.2 Strict Internalised Cognition. 14

5.2 The Missing Mental Model 14

5.2.1 The Participant Simply Won’t Get It. 14

5.2.2 Changing the Narrative, Message, Language and Metaphor. 14

5.2.3 Individuals Would Have to Live and Breathe This to Understand. 15

5.2.4 Seeing the Data from The Other Side Is A Significant Cognitive Load. 15

5.3 Exposure of The Underlying Mechanism 16

5.3.1 What Participants Need to Understand, See and Have Access To. 16

5.3.2 Exposure of the Mechanism and the Value Proposition. 16

5.4 Back Pedaling on Friction 16

5.4.1 We Are Asking Users to Step Backwards 16

5.4.2 This Is Going Against Modern UX Principles. 16

5.5 The Case for Automation 17

5.5.1 An Agent or Personal Jeeves. 17

5.5.2 Scalability. 17

5.5.3 Setting Broad-Brush Stroke Policy. 17

5.5.4 A Trust Network to Drive Agent Decisions. 17

5.6 Third Party Offloading 17

5.6.1 Power of Attorney for The Young, Old and Infirm. 17

5.6.2 To A Group or Affiliation. 17

5.6.3 To a Public Service Operator. 18

6.0 Broader Themes 18

6.1 Remove / Secure the Data. 18

6.2 We Can Only Ever Disrupt Data Access. 18

6.3 The Problem with Trust Frame Works. 18

6.4 This Is Now A Design Problem. 18

6.5 Demonization is Energy Poorly Spent. 19

## 1.0 Thematic Content Analysis

In the context of this publication this supplemental presentation of Thematic Analysis has been simplified. It is hoped that this work will not only act as support for discussion, but also act as a resource for others considering both value and interaction within decentralised web artefacts and Self Sovereign Identity systems.

Thematic analysis was undertaken following 3 stages of semi structured interviews, supported by the relative results from a public survey and broad academic framework. Interviews have been transcribed and time stamped. All transcriptions were loaded into the qualitative analysis application NVivo. The transcriptions were coded through a number of cycles of generation and combination. While undertaking the analysis a total of 48 codes were generated.

Once coded, collections of quotes associated with codes were printed, and the process of memoing was undertaken physically. Through this process a significant number of themes were identified. Themes were then categorised into 3 core areas, Adoption, Interface and General Concept. In total 64 themes have been defined.


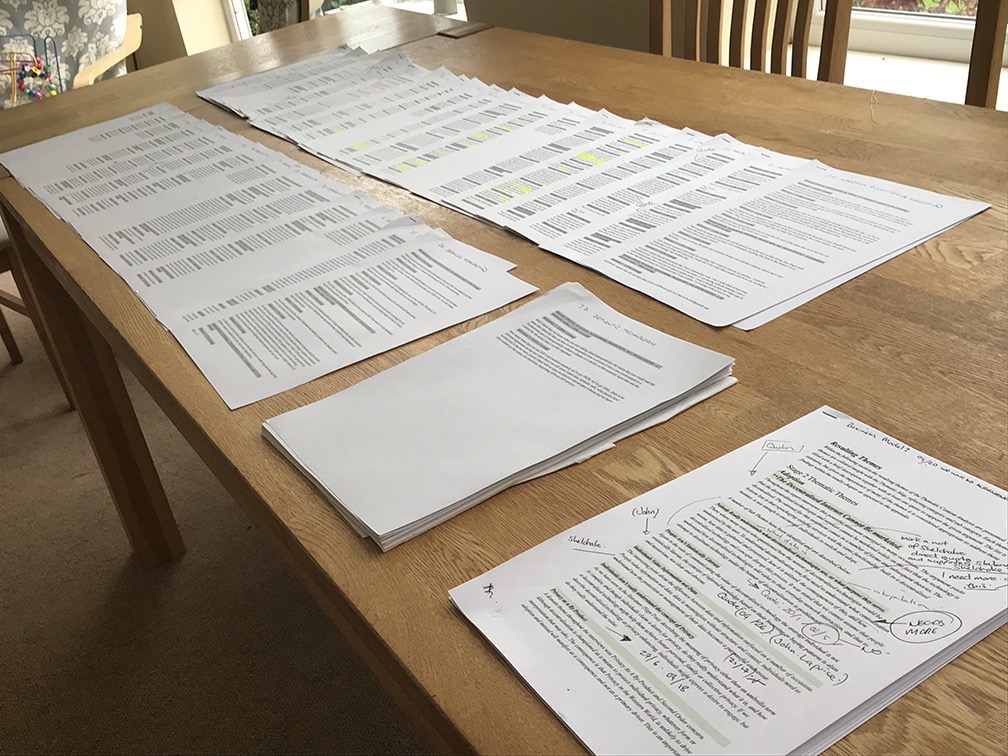


Figure 1: Documenting the Memoing Process

## 2.0 Preliminary Thematic Mapping


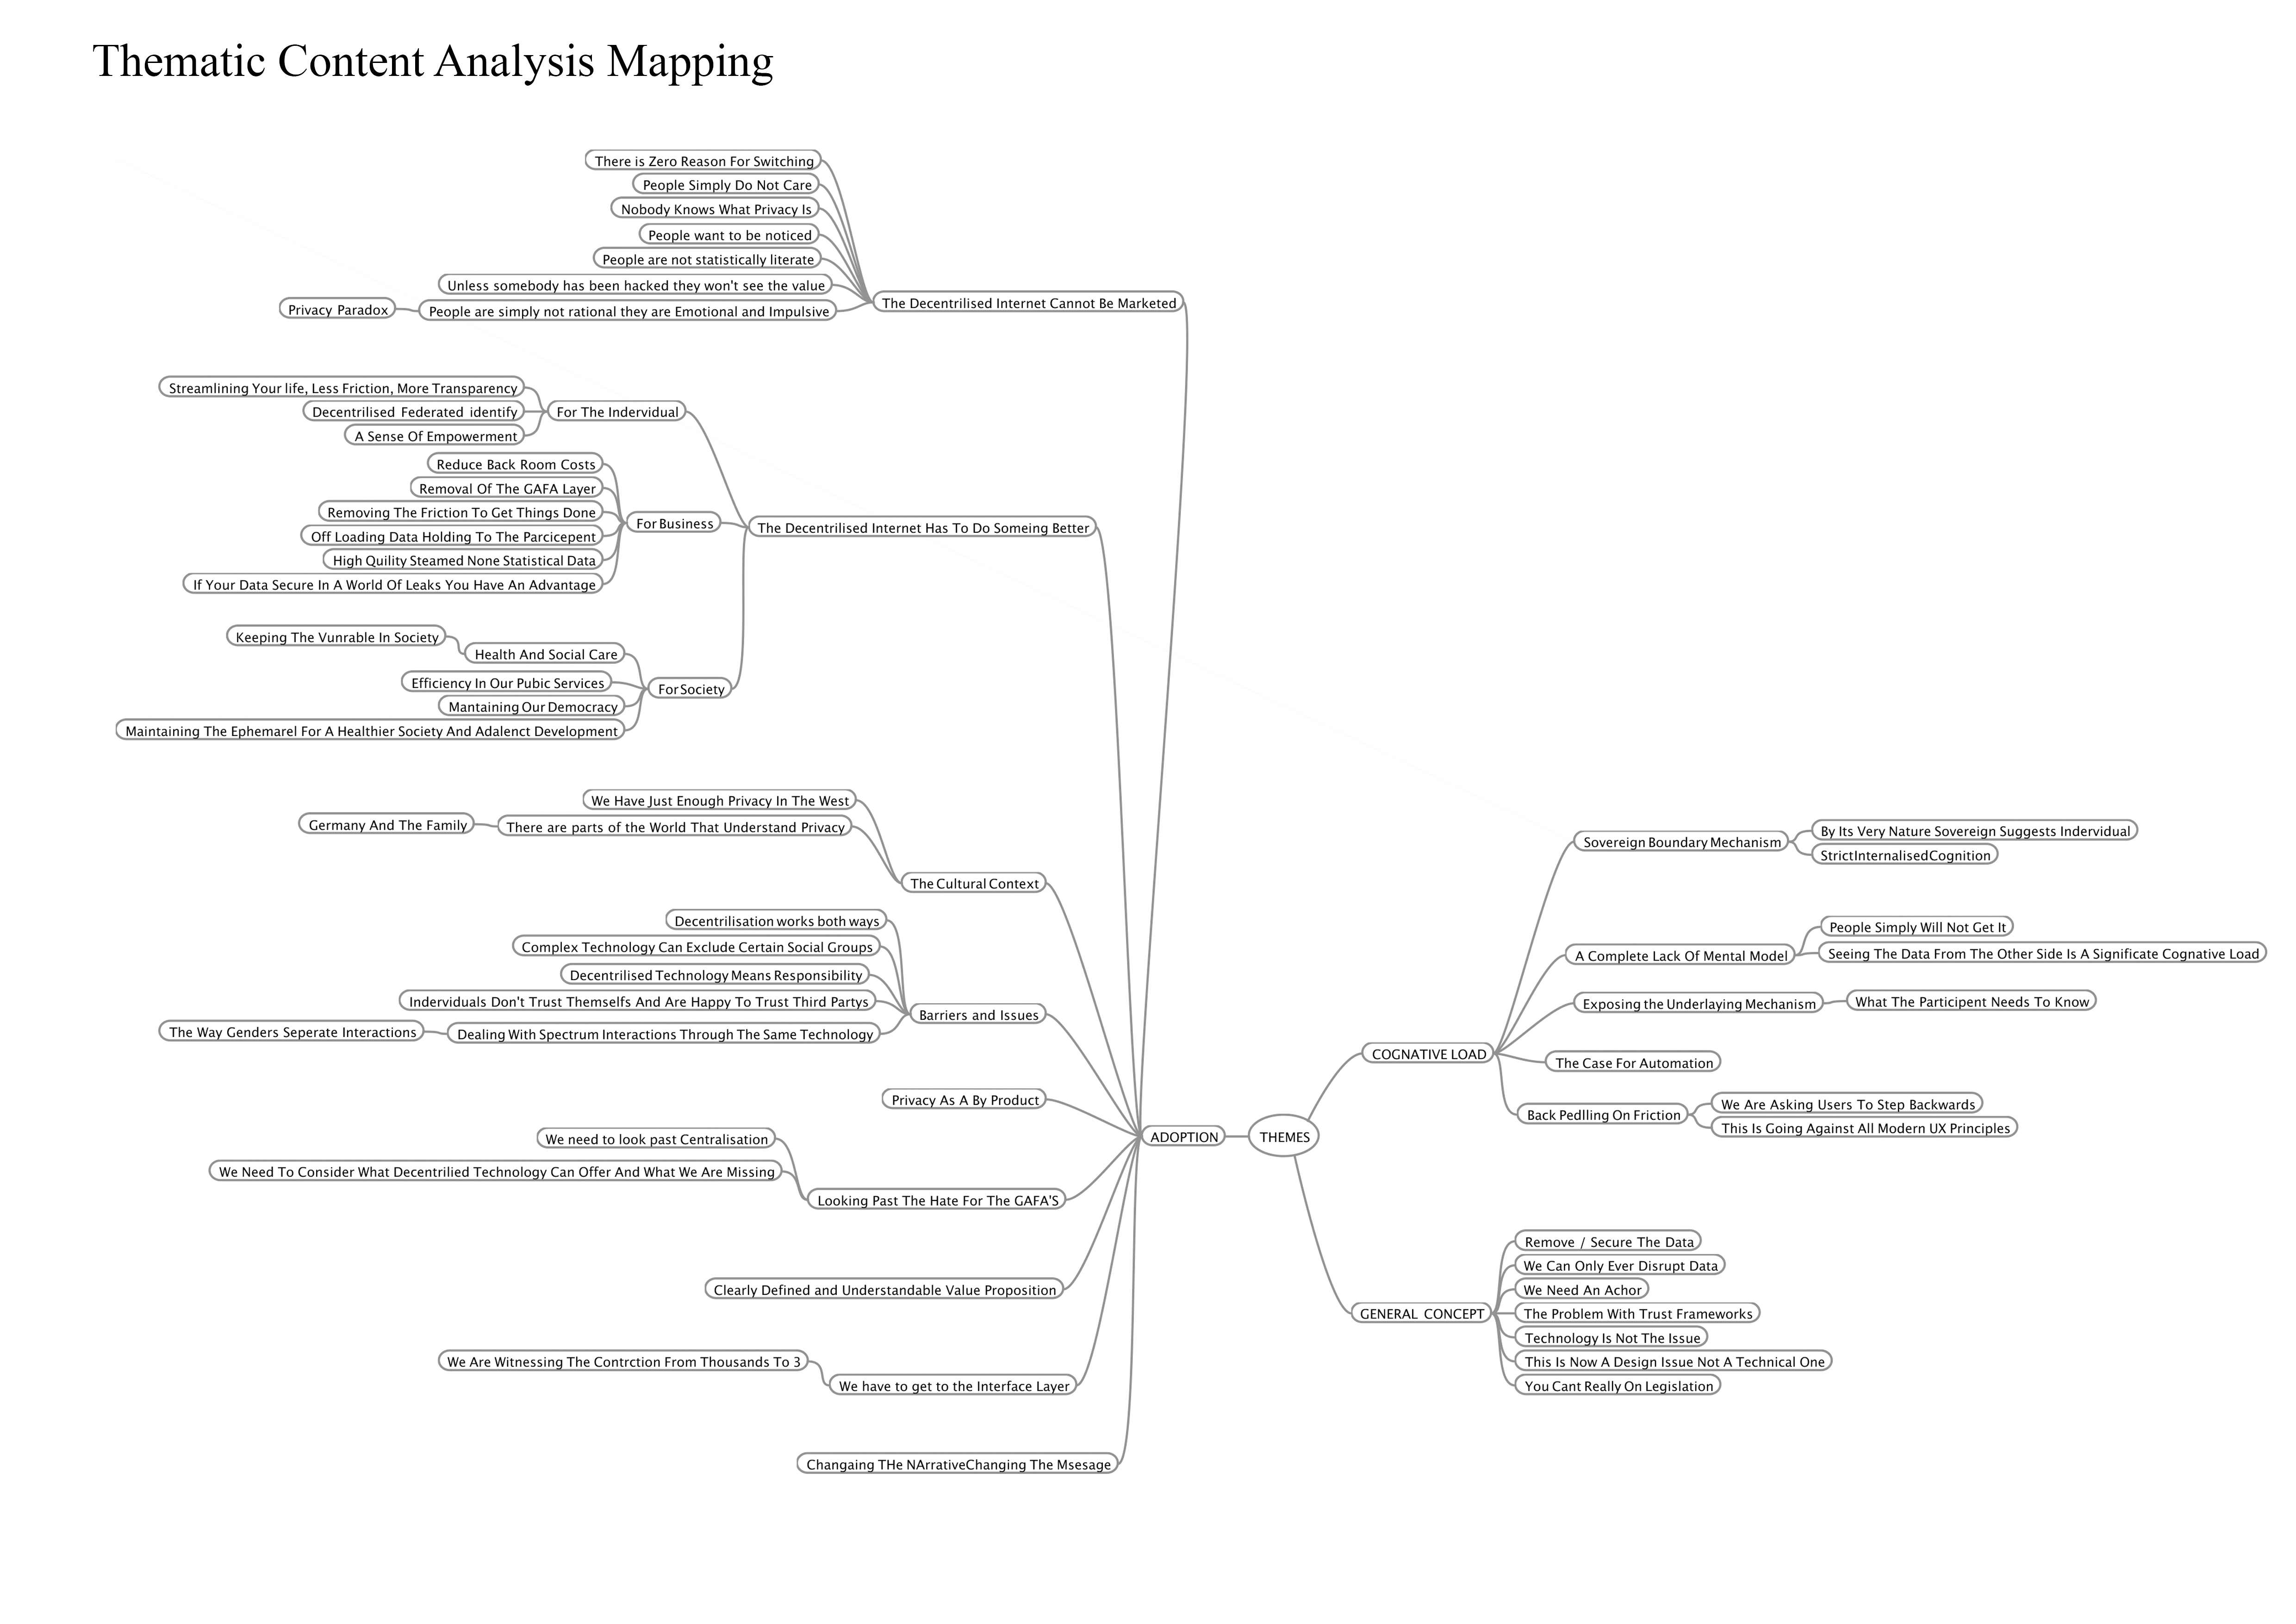


Figure 2: Thematic Content Analysis Mapping

## 3.0 Resulting Themes

Within this section the resulting themes of the content analysis are presented. The themes were collated in line with the thematic map, reflecting category and subcategory. Each theme is titled with a brief description.

#### 4.0 Adoption

#### 4.1 The Decentralised Internet Cannot be Marketed.

Throughout the expert interviews this powerful statement emerged on many occasions. The argument posits that decentralised technologies and services cannot be marketed solely on the fact that the technology is decentralised. The rationale for this statement comes in a number of forms and subsequent theories. The consensus is that repackaging existing services with the same functionality, built in a decentralised manner, is not enough to encourage individuals to switch and adopt.

A number of sub themes regarding the marketing of decentralised technologies have been identified and are described below:

4.1.1 Nobody Really Understands Data, What Decentralised Technologies Are, or What Purpose They Serve.There were many voices who questioned how the notion of decentralised technologies would be understood by the participant. To understand decentralisation, you first need to understand what centralisation means, how data is gathered and processed, how it is utilised, the consequences of this, and how decentralised technology and concepts disrupt this process. It was stated that we cannot assume that people understand how decentralised technologies add value to their everyday network interaction, and thus to attempt to disseminate technology under the banner of decentralisation is problematic.

4.1.2 People Aren’t Statistically Literate.Again, in the vain of communicating the value of decentralised technology the average individual is not statistically literate. The concept of inferred knowledge based on their browsing or buying patterns is alien and mysterious, and not clear or obvious.

4.1.3 Individuals Value Information Not Data.The interesting point about the difference between data and information surfaced on a number of occasions. People value information not data. Data is meaningless without structure and context. Individuals need to understand how the protection or management of their data becomes a purposeful endeavour.

4.1.4 Individuals Don’t Really Understand the Concept of Privacy. The concept of privacy understanding emerged as a latent theme. As seen in the literature, describing the meaning of privacy other than as an umbrella term is complex, and though individuals claim a desire for privacy, do they really understand what it is, and how a decentralised technology might help them achieve better personal, family or collective privacy. If we describe decentralised technology as privacy enhancing, individuals might express a desire to engage, but do they really understand its value.

4.1.5 Privacy as a By Product.An important theme throughout the interviews was privacy as a by-product and second order concern. Although decentralisation is championed as a means to protect individual privacy, whatever form or interpretation that may take, the consequence is that the prospect of privacy in the western world is unlikely to drive adoption, and instead will manifest as a consequence and not as a primary driver. This is an important point as it potentially acts as a major consideration in the development of strategy for the decentralised community.

4.1.6 Unless They’re A Die-Hard Activist, Is A User Really Going to Jump to An Inferior Decentralised Alternative. A topic raised on a number of occasions, and one that forms a latent theme, questioned the logic of anybody leaving established high-quality centralised services to move to a lesser quality service just because it is decentralised. The consensus seemed to be that in reality this is simply not going to happen.

4.1.7 Individuals Don’t Want to Hide.This latent theme argues thatin a world where our participatory digital culture is becoming increasingly broadcast focused, where social standing, interaction and omni presence are socially inclusive norms, is decentralisation really that attractive and does it really warrant social reclusion or off grid mentality? Do people really want to hide?

4.1.8 People Simply Don’t Care.The statement of apathy was made on a number of occasions. People simply don’t care and have better things to worry about and lives to lead. Unless they have suffered a hack or data breach people are unlikely to see any value in decentralisation or engage in decentralised technologies.

4.1.9 People Are Not Rational, They Are Impulsive and Emotional Creatures. On a number of occasions, the point was made that human beings are not always rational, and that many of the actions that we undertake can be based on emotion and impulse. We see this in the theory of the Privacy Paradox and Instant Gratification Bias. In the conceptualisation and design of decentralised tools this is certainly something that should be considered.

#### 4.2 The Decentralised Internet Must do Something More

Following on from the theme that the Decentralised Internet cannot be marketed, the general consensus is that in order to achieve adoption, it has to do more to add value and advantage. Decentralised technology has to develop innovations to supersede a centralised model. This process has identified a number of opportunities for innovation. These have been divided by context into three sub-categories: The Individual, Business, and Society.

#### 4.3 The Individual

A number of themes concerning the topic of value for the individual have been identified, and are described below:

4.3.1 Streamlining Your Life, Less Friction, Instant Gratification, More Transparency. This theme embodies a core value of decentralisation as it argues that the collection and control of personal data, the capability to combine, to reuse, to utilise and understand personal credential and data streams, offers an opportunity to simply make our lives easier. It streamlines our everyday activities and reduces the friction in getting tasks accomplished.

4.3.2 Decentralised Federated Identity.The federation of established identity across interactions and services is a powerful concept, and one which is utilised by the centralised Internet, as participants develop rich identities that they themselves will never truly own. To control an identity, disseminate and reuse it in a way the participant chooses, and to invest and build persona and digital presence in a Sovereign Boundary Mechanism is a powerful concept as it liberates users from the dominant digital oligarchs.

4.3.3 A Sense of Empowerment, Transparency and Agency.Decentralised technology offers the participant a sense of empowerment, affording the same degree of control in the digital space that they enjoy in the real world. Individuals can understand their network relationships, their past transactions, their patterns of interaction, combine data streams to infer and inform, and ultimately decide who or what has access to the data and subsequent information they control.

4.3.4 Avoiding the Cost of Surveillance Capitalism. A powerful theme and narrative is the cost of surveillance capitalism in the sense that a centralised model locks in and prevents users from engaging in alternative business models, and also from a societal and democratic prospective. Control and cost are powerful narratives, and if coupled with tailored value propositions could prove compelling arguments for adoption.

4.3.5 Security in The Ephemeral. This latent theme derived from conversation regarded public benefit and privacy is that of the ephemeral. The prospect of decentralised technology restoring the ephemeral back into exchange of opinions and views and general conversation is a powerful narrative, if expressed and understood correctly.

#### 4.4 For Business

A number of themes concerning innovation opportunities for business have been identified and are described below:

4.4.1 Removal of the GAFA Stranglehold.The reality of the GAFA portal ‘Google, Apple, Facebook and Amazon’ was raised a number of times during interviews. We have seen a significant contraction of entry points to the network. Hardware, storage, supporting technology, marketing and federated identities are now reliant in some way on the network’s dominant forces. The prospect of decentralisation offers liberation from this monopoly and is seen by many as an energising innovation.

4.4.2 Removing the Friction to Get Things Done.Friction is a significant obstacle to transactional completion and overall customer experience, for which reducing or removing through decentralisation is considered to offer great efficiency.

4.4.3 Off Loading the Responsibility, and Cost of Holding Data.Recent strengthening of data protection law has seen greater accountability placed on data holders and processors. The costs involved in securing data are increasing for existing companies and present a significant overhead and risk for start-up businesses. If a decentralised model can allow companies to access verified customer data in a remote location, on demand and only when needed for the purposes of the transaction in hand, the commercial benefits are clear.

4.4.4 If Your Data is Secure in a World of Leaks You Have a Competitive Advantage.In a world where news of data breaches continues to be a regular occurrence, if a business’s processes are clearly more secure than their competitors, then the secure data model offers a clear competitive advantage.

4.4.5 Reducing Back Office Costs.Backroom costs featured as a prominent point in light of participants being able to provide verified credentials within a decentralised model. It is noted that although companies have off loaded labour costs for data entry, any data they received as part of a transaction still had to be checked, whether at a fundamental level of units or address, all the way through to licenses, certificates, ratings and applicant background. Any model that could significantly reduce these processing costs would give a competitive advantage.

4.4.6 High Quality Streamed, Realtime, Non-Statistical Data.The concept of clean, streamed, up to date, non-statistical data is a latent theme that emerged through the interviews. At present, commerce is reliant on statistics that support market intelligence and advertising. Customer data can be inaccurate and can quickly become dated. The majority of current data is static, approximated and by its very nature historic. Decentralised models through vendor relationships offer the prospect of live streamed, real time data, which is potentially far richer and relative. Customer loyalty, relationship, service, business planning and efficiencies would vastly improve through dynamic data streams.

4.4.7 New Forms of Business Based on Vendor Relationship Management.The reversal of relationships between participant and vendor, the availability of real-time ethically sourced data empowering the participant to cast intentions, emancipation from the GAFA’s and the levelling of the playing field will disrupt the current centralised model and will generate new forms of business opportunity. A great deal of R&D has been undertaken through past VRM projects, and they act as a valuable resource for future developers.

4.4.8 Customer Relationships, Trust, KYC. This latent theme centers around the building of customer relationships through a Web of Trust which will provide a means for business to satisfy their responsibility to Know Their Customer. This will reduce friction and costs in this area and contribute to seamless transactions.

#### 4.5 For Society

A number of themes concerning the benefits to society have been identified and are described below:

4.5.1 Maintaining the Ephemeral for a Healthier Society and Adolescent Development. During interviews and within the literature the concept of perceived privacy, surveillance capitalism, profiling and the impact this has on our social norms, especially as an adolescent population, has become important. The premise that the ephemeral is important in our daily social interactions, and the development and shaping of identity and relationships in younger persons, is a very compelling argument. In essence, individuals need to explore the boundaries of society and develop as human beings without the fear of every interaction, conversation and choice being a matter of indefinite record in the ether of the network.

4.5.2 A Stronger More Cohesive Society. The benefits of data sharing and utilisation across a social context in terms of education, health care, social care, crime prevention, planning, efficiency, the smart city, and the environment would benefit significantly from a decentralised network. The means to share personal data in a secure and trusted manner would mean powerful real-time data streams feeding into all facets of a data driven society.

4.5.3 Maintaining Our Democracy. Conversations reinforced the risk to our democracy of centralised data gathering, processing and inference poses. Although the eradication of targeted influencing through individual profiling is unlikely, a Decentralised Internet may at least offer a means of disruption, and a return to a more private and internalised semblance of political position and voting intention.

4.5.4 Efficiency in Our Public Services. Efficiency in public services can be improved and ultimately costs reduced significantly through the availability of real time data. Public health, planning, transportation, energy consumption and social care are but a fraction of societies services that could be improved.

#### 4.6 The Cultural Context

A number of themes concerning cultural considerations have been identified and are described below:

4.6.1 The West Has Just Enough Trust.Just enough trust is a theme that considers the culture attitude, and the geo economic and political landscape. The argument suggests that the western world currently enjoys just enough trust not to concern itself with decentralised tools and services. There are data breaches, and the topic of surveillance and privacy in the digital realm is prominent in the media, but there is still a sense of security. We aren’t completely exposed, and very few individuals have experienced a catastrophic data breach that has resulted in personal reputational or financial harm.

4.6.2 Parts of the World and Cultures that Value Privacy. A strong theme throughout has been that of cultural difference, attitudes and understanding. Differing parts of the world consider privacy differently, and value it for a number of varied reasons. A western liberal democracy understands value proposition within privacy enabling technology in a different way to a repressed culture. Cultures who live within or have a recent history of state surveillance may have a differing world view to others. Considering cultural differences is a key consideration when developing for adoption. During interviews a participant commented: ‘I mean our experience in Germany is completely different from this country and our experiencing in the Far East just different again’.

4.6.3 One Size Does Not Fit All.The notion of one size not fitting all relates to the above themes, in that designing one decentralised solution or engineering a value proposition to suit all cultures and conditions may require reconsideration. The prospect of multiple angles and the requirements of different user groups offers design opportunity. If the objective is to roll out a standardised Sovereign Boundary Mechanism, differing problem spaces can be identified, and applications and messages tailored to the circumstance, raising the probability of adoption.

#### 4.7 Routes to Adoption

A number of themes focusing on routes to adoption have been identified and are described below:

4.7.1 High Value High Friction. Concepts have been expressed regarding routes to market, adoption and traction. A significant concept is the steering away from the mass consumer market and instead targeting big business and identifying transactions which experience high friction and regulatory burden. It is suggested that there is real value proposition in this area.

4.7.2 Targeting Cultural Context as a Brake Through Mechanism. The theme around targeting of cultural context relates to seeking cultural, social, political and geographic groups that might see a significant value proposition within their current reality. The argument suggests that in order to drive innovation and momentum, pockets of respective user groups should be pinpointed and supported: Germany was raised as a culture that understands privacy from a family perspective. The unbanked living within corrupt or failing economies, individuals who are undocumented in immigrant or refugee communities, and repressed populations living without many of the liberties enjoyed in the western world are examples of differing context. Targeting cultural context would allow efforts to foster adoption and develop innovation to be strategically planned, while supporting those who would arguably benefit from decentralised technology the most.

4.7.3 On-boarding and Companies Bringing their Existing Customers with them. The on-boarding concept through existing customers comes from the argument that, given the complexity of the technology, many users are likely to be introduced to, and lead through initial engagement instead of adopting independently. This leads to the idea that if a large organisation already has an existing registered user base, and a decentralised innovation can be proven to support or streamline that organisation, existing customers can be transposed to a decentralised system on masse, without even becoming aware they have moved to a new paradigm of network engagement. From there, new innovations, ideas and applications can slowly be introduced. This model can be seen in the experimentation being undertaken in Canada through a number of credit unions.

#####

#### 4.8 Barriers and Issues

A number of themes concerning barriers to adoption and general issues have been identified and are described below:

4.8.1 Getting to The Interface Layer.Targeting the interface layer is an issue that’s raised as both an objective and, in this context, also a significant challenge. As the dominant Internet forces drive to channel traffic through their own interface layer, the challenge of reaching these layers becomes difficult. Whether this is hardware, application, search, commerce or entertainment portal, accessing an interface layer that is not either directly or indirectly controlled by a dominant force is a significant issue.

4.8.2 Decentralisation Works Both Ways.An interesting latent theme identifies the issue of decentralisation working both ways. Once verified personal credentials and information can be easily established and disseminated, demands for such data could raise significantly and we may find ourselves in a situation where companies and organisations demand ever increasing access to personal data in exchange for goods and services. Information and data currently outside of the boundaries of availability, may quickly prove more problematic than helpful. To counter, the surrounding mechanisms of decentralisation need to be in place as well as the data itself, if we are to avoid these potential negative unforeseen consequences.

4.8.3 Complex Technology Can Exclude Certain Social Groups.The notion of exclusion is a broad and complex consideration. For those who are time rich, well-educated and technology literate, the advent of decentralised tools may prove valuable, but for those in society who lack the fluidity to engage, the advent of such technologies may prove to exclude and alienate from valuable opportunities. The situation may be likened to an extended version of what is currently observed with computing technology and the older demographic in our society.

4.8.4 Decentralised Technology Means Responsibility. A powerful theme relates to responsibility. Decentralised technology by its nature realigns the management of personal data back to the individual. A paradigm shift away from centralisation creates a significant responsibility which may be embraced or rejected across many differing contexts. The argument is that decentralisation places a significant responsibility on the shoulders of the participant, and the ongoing friction associated with the management of personal data may prove problematic.

4.8.5 Individuals Don’t Trust Themselves and Are Happy to Trust Third Parties. Continuing from the theme of responsibility, an individual’s confidence and competence to manage their own personal data needs to be considered. Once an individual is faced with the potential complexity and workload of managing their own personal data, it may transpire that many simply have no interest in doing so and may indeed be happy for a third party to do that for them. That may be a family member or friend, a public service organisation, or a designated organisation specialising in this area of personal service. The argument would appear to be, that we should not assume that individuals will want, or have confidence in themselves to control their own data.

4.8.6 Dealing with A Spectrum of Interactions Through the Same Technology.An interesting theme came through a conversation about different social and gender groups, that males tend to feel comfortable conducting their affairs through one network domain, whereas females tend to prefer to separate their interests across a number of unrelated domains. Another interesting discussion suggested that gay men might see the benefits in a self-sovereign decentralised system if it helps their community manage sexual health, but that they might not be comfortable dealing with other personal issues through the same domain. The central argument is that a decentralised digital wallet for managing personal data, will need clear boundary domains, if people are to feel comfortable and confident using it, at least at the beginning. So that in early email adoption terms, the classic error of mistakenly sending an email to all contacts can be avoided.

4.8.7 Non-Profit Does Not Make A Good Business Model. How technology and resource is funded without a capital driven business model is hard to understand. The centralised internet has a clear model of data collection and exploitation to drive market intelligence and advertising. The consensus is that everybody would benefit from a Decentralised Internet, including the traditional capital driven models once established. But getting there will require significant investment, and it is difficult to see how the ecosystem gets to a sustainable position and critical mass.

##

## 5.0 Interface ‘Cognitive Load’

A number of themes concerning human interfacing with decentralised technologies have been identified and are described below:

5.1 Sovereign Boundary Mechanism. This concept is a latent theme which describes a realm in which a participant has a surrounding boundary of control, within which they exercise agency over the terms by which personal data can be transacted through a number of core mechanisms. The boundary is sovereign, and traffic moving from the network into the participant’s domain and back out again, stops at the boundary where management, access and dissemination of data is controlled, either on a case by case basis, or automatically based on a number of predetermined parameters.

5.1.1 By Its Very Nature Sovereign and User Centric Suggests the Individual. Across interviews a topic related to a Human-Centred Data Ecosystem and what it means to be sovereign was both engaging and prominent. The notion relates to independence of the participant. In order to be sovereign on the network a user must control and take responsibility for their own data and information. The user requires transparency, understanding and the agency to decide how and where personal data is distributed and utilised.

5.1.2 Strict Internalised Cognition.If a participant is to take control of their own personal data in a decentralised context meaning there is no third party in the equation, and if the participant is to have the confidence in a system, approach and interaction, a developed internalised understanding will be required, in much the same way as an individual understands the process of withdrawing money with an ATM, i.e. the proving of identity, withdrawal of wealth, and the updating of a ledger. A user of a decentralised system will require a rather complex and in-depth understanding of what are arguably demanding abstract concepts if they are to confidently, efficiently, and sustainably engage with such a system.

#### 5.2 The Missing Mental Model

Themes concerning this topic have been identified and are described below:

5.2.1 The Participant Simply Won’t Get It.The general expert position when confronted with the complexity of an analogue decentralised engagement is that the participant will simply not understand it. It is suggested that there is no precedent or real metaphor to describe the underlaying concepts and interactions and as such any participant will struggle to make sense of the environment. Many of the concepts and interactions are considered to be abstract and gaining an understanding and confidence to engage will potentially require a considerable amount of assistance or experimentation.

5.2.2 Changing the Narrative, Message, Language and Metaphor.The need to re-evaluate and reconsider the narrative, message, language and metaphor from a strategic perspective is considered very important. In order to canvas value and a better understanding of what decentralised technologies can offer the participant, the communication needs to be considered, meaningful full and consistent. A key point raised was to replace the word privacy with control, that people don’t understand the concept of privacy, but when you begin to talk about being controlled people very much get it.

5.2.3 Individuals Would Have to Live and Breathe This to Understand.An interesting point raised was concern that for an individual to engage with a full analogue decentralised system, a participant would have to be using such a system on a continuous basis, in order to develop and retain the required understanding.

5.2.4 Seeing the Data from The Other Side Is A Significant Cognitive Load.An interesting view held in relation to a participant’s mental model is that of an understanding of how data manifests itself on the other side of any transaction. This is considered important as participants make judgements regarding how they manage their own personal data. It is suggested that grasping the view of one’s personal data from the opposing side of a data exchange poses a significant cognitive task.

#### 5.3 Exposure of The Underlying Mechanism

Several themes concerning this topic have been identified and are described below:

5.3.1 What Participants Need to Understand, See and Have Access To. A theme discussed and raised on several occasions was that of the exposure of the underlying mechanism. For a participant to engage with a system, learn how a system functions, and attain the required agency specified within the HDI, SSI principles, what level of exposure is required? Is there a balance between possible control and interaction and the development of a truly Decentralised Internet? In discussing the level of understanding required.

5.3.2 Exposure of the Mechanism and the Value Proposition. An important theme is that of the exposure of the mechanism and value proposition. This is considered a balance in terms of perceived value. If the system is fully automated and controlled by AI the participant has no understanding of what the underlying system or mechanism is doing, and as such, unless the participant has complete trust in the system, they potentially see little of the value. By contrast, if the system reveals and provides access to all of its mechanism, the participant is potentially overwhelmed, the cognitive load is too great, and adoption is unlikely. There is a potential paradox, or at the very least variable, for balance in any design discussion process.

#### 5.4 Back Pedaling on Friction

A number of themes concerning this topic have been identified and are described below:

5.4.1 We Are Asking Users to Step Backwards**.** In the light of the emergence of Self-Sovereign Identity as the leading light of decentralised development, the issue of usability struggles to maintain the contemporary practice surrounding HCI and usability design. Any scalable analogue SSI interface is considerably complex and pushes against the design philosophies of simplicity and low friction. To engage with a UI enabling the full-scale SSI interaction poses a challenge to designers and stretches the limits of the participant’s attention. It is felt, in the short term at least, engagement will require an expectance of complexity and friction.

5.4.2 This Is Going Against Modern UX Principles. In terms of designing a user experience model from contemporary and more specifically, Self-Sovereign Identity systems, we are going against modern UX principles by introducing complexity and arguably internalised cognitive load. These systems are complex and in order to move forward we arguably need to step away from the concept of lowering friction.

#### 5.5 The Case for Automation

5.5.1 An Agent or Personal Jeeves That Acts in the Best Interests of its Master.The prospect of an agent or personal assistant is raised on a number of occasions, with the argument being that it would be unlikely that any participant would have the inclination to manage each and every exchange of data or credential through a decentralised system. As such, any system would require an agent driven by some means of AI, working on behalf of the participants, to monitor and manage the mundane, and flag any important issues to its master.

5.5.2 Scalability.The issue of scalability of systems was discussed as an issue on a number of occasions. Given the volume of data any Human-Centred Data Ecosystem would be tasked with managing, particularly in the form of SSI, it would soon run into scalability issues. Managing data and understanding transactions within a small scale, lab-based demonstration, is straightforward; in the real world it is quite something else.

5.5.3 Setting Broad-Brush Stroke Policy.In any agent or AI supported decentralised system, the concept of establishing a broad-brush policy which drives decision making is a recurrent theme. The participant either defines the broad policy or the system itself learns the participant’s preferences. Decisions are then automatically made based on these policies.

5.5.4 A Trust Network to Drive Agent Decisions.The notion of a trust framework or affiliated group driving decision making is a powerful theme. Such a system, for example, could make automated decisions on the disclosure of personal information based on a collective intelligence or political affiliation.

#### 5.6 Third Party Offloading

5.6.1 Power of Attorney for The Young, Old and Infirm.A barrier to adoption for SSI is the cognitive loads and emotional impact of taking full responsibility for one’s data and its management. At present, participants may not have control over their data but they have the comfort of knowing that it is being held by a third party who, at the very least, prevents all out data loss, and on the whole provides easy access to data in an understandable context. An interesting area around SSI is the notion of passing control over identity and elements of data to others. This may be to a family member or a loved one. The concept may benefit the very young, for example, a child’s medical records managed by a parent. It might also help older people who are less technically literate, or the ill or infirm. This concept of giving trusted parties control over personal data may also find value for those who simply do not want the responsibility.

5.6.2 To A Group or Affiliation.The notion of offloading part or all of the responsibility for one’s personal data to a third party aligns with the concept of group or affiliation. This is very much in the vain of a trust network in which an individual’s hand over responsibility for decision making through broad brush policy alignments. A very interesting evolution of this is the concept of political affiliation, a democracy in which the off-loading of the control of data becomes almost a dynamic way of continually casting a vote.

5.6.3 To a Public Service Operator.Suggestions have been made during debate that one type of custodian of personal data and decision making might be a public service operator. In this case the organisation cited was the British Broadcasting Corporation (BBC). How exactly this would function is unclear, but it would presumably be under some extended charter yet to be considered. In the context of offloading responsibility, it is a concept worth exploring.

## 6.0 Broader Themes

The following themes where defined as broader more general ideas and concepts that fell outside of the definition of either Adoption or Cognitive Load.

6.1 Remove / Secure the Data. A powerful theme and subsequent argument comes from the notion that, wherever possible, data is removed from the equation altogether. The argument is that the primary issue is the underlying technical model, the centralisation of data on servers. A distributed addressable model of data storage removes the target and thus, in many cases, the vulnerability. IPSS and Maidsafe have already proved the concept at scale and embracing this method of data storage may supersede many of the decentralised ideas around access control and contracts.

6.2 We Can Only Ever Disrupt Data Access.The general consensus is that we will never be able to control all of our personal data generated individually, in connection with others or inferred by organisations. It is also unlikely that we could control access to data without relying on some type of external authority or legal framework. Instead, we need to better understand what we can and cannot control, and what we can disrupt. A clear understanding of this might assist in strategic planning, the design of technology, and the development of value proposition.

6.3 The Problem with Trust Frame Works.There has to be some trust and solid ground in the transactional and identity verification equation. The principles of a Decentralised Internet give the individual agency, placing the participant at the centre of data streams, enabling independent choices about who and what to trust. At present, we have certification to assure us that online entities are who and what they claim to be. With the advent of decentralisation, this is potentially going to change, requiring new forms of trust anchors or frameworks across contexts. Trust could be seeded and maintained by community, state or public service organisation, or could be developed through new forms of dynamic reputation mechanisms. The concept of a trust framework is a complex issue which to date, it is argued, has been considered through a very narrow lens.

6.4 This Is Now A Design Problem. A powerful theme is that the problem of achieving decentralisation has moved from the development of the technology layers, through to one of user experience, interaction and product design. Through encryption, distributed ledger and existing standards, the pure computer science solutions are now in place to deliver decentralised technology.

6.5 Demonization is Energy Poorly Spent. The argument is that many in the decentralised community are wasting their energy by focusing on an Orwellian two minutes of hate towards the capitalist GAFA’s. This of course is a political position, one of many within the decentralised community. The argument is made that the narrative is being hijacked by a regressive activist position, when the objective should be to look past the dominance of the current technology giants and instead look forward to how decentralised technologies can supersede, innovate and drive the next stage of the Internet’s development.
